# Supplementary material
Source: Springer Nature journal article supplement (https://www.springermedizin.de/resource/supplementary/13054_2005_3674_MOESM2_ESM.pdf/9721026)
Supplement: MOESM2 [file 9721026]

**ADDITIONAL FILE 2**

| <b>CAM-ICU Features and Descriptions</b>                                                                                                                                                                                                                                                                                                                                                                                                                                                                                                                                                                                                                                                                                                                                                                                                                                                                                                                                                                                                                                                                                                                          |                                             |                |              |              |                                 |                                |                               |                                    |                                               |                                             |                                          |                                      |
|-------------------------------------------------------------------------------------------------------------------------------------------------------------------------------------------------------------------------------------------------------------------------------------------------------------------------------------------------------------------------------------------------------------------------------------------------------------------------------------------------------------------------------------------------------------------------------------------------------------------------------------------------------------------------------------------------------------------------------------------------------------------------------------------------------------------------------------------------------------------------------------------------------------------------------------------------------------------------------------------------------------------------------------------------------------------------------------------------------------------------------------------------------------------|---------------------------------------------|----------------|--------------|--------------|---------------------------------|--------------------------------|-------------------------------|------------------------------------|-----------------------------------------------|---------------------------------------------|------------------------------------------|--------------------------------------|
| <b>1. Acute Onset or Fluctuating Course</b>                                                                                                                                                                                                                                                                                                                                                                                                                                                                                                                                                                                                                                                                                                                                                                                                                                                                                                                                                                                                                                                                                                                       | <b>Absent</b>                               | <b>Present</b> |              |              |                                 |                                |                               |                                    |                                               |                                             |                                          |                                      |
| <p>A. Is there evidence of an acute change in mental status from the baseline?<br/> <b>OR</b><br/>                     B. Did the (abnormal) behavior fluctuate during the past 24 hours, that is, tend to come and go, or increase and decrease in severity as evidenced by fluctuation on a sedation scale (e.g. RASS), GCS, or previous delirium assessment?</p>                                                                                                                                                                                                                                                                                                                                                                                                                                                                                                                                                                                                                                                                                                                                                                                               |                                             |                |              |              |                                 |                                |                               |                                    |                                               |                                             |                                          |                                      |
| <b>2. Inattention</b>                                                                                                                                                                                                                                                                                                                                                                                                                                                                                                                                                                                                                                                                                                                                                                                                                                                                                                                                                                                                                                                                                                                                             | <b>Absent</b>                               | <b>Present</b> |              |              |                                 |                                |                               |                                    |                                               |                                             |                                          |                                      |
| <p>Did the patient have difficulty focusing attention as evidenced by <b>scores less than 8</b> on either the auditory or visual component of the <b>Attention Screening Examination (ASE)</b>? (Instructions on next page).</p>                                                                                                                                                                                                                                                                                                                                                                                                                                                                                                                                                                                                                                                                                                                                                                                                                                                                                                                                  |                                             |                |              |              |                                 |                                |                               |                                    |                                               |                                             |                                          |                                      |
| <b>3. Disorganized Thinking</b>                                                                                                                                                                                                                                                                                                                                                                                                                                                                                                                                                                                                                                                                                                                                                                                                                                                                                                                                                                                                                                                                                                                                   | <b>Absent</b>                               | <b>Present</b> |              |              |                                 |                                |                               |                                    |                                               |                                             |                                          |                                      |
| <p>Is there evidence of disorganized or incoherent thinking as evidenced by <b>incorrect answers to 2 or more of the 4 questions and/or inability to follow the commands</b>?</p> <p><b>Questions</b> (Alternate Set A and Set B):</p> <table style="width: 100%; border: none;"> <tr> <td style="text-align: center; width: 50%;"><b>Set A</b></td> <td style="text-align: center; width: 50%;"><b>Set B</b></td> </tr> <tr> <td>1. Will a stone float on water?</td> <td>1. Will a leaf float on water?</td> </tr> <tr> <td>2. Are there fish in the sea?</td> <td>2. Are there elephants in the sea?</td> </tr> <tr> <td>3. Does one pound weigh more than two pounds?</td> <td>3. Do two pounds weigh more than one pound?</td> </tr> <tr> <td>4. Can you use a hammer to pound a nail?</td> <td>4. Can you use a hammer to cut wood?</td> </tr> </table> <p><b>Other:</b></p> <ol style="list-style-type: none"> <li>1. Are you having any unclear thinking?</li> <li>2. Hold up this many fingers. (Examiner holds two fingers in front of patient)</li> <li>3. Now do the same thing with the other hand. (Not repeating the number of fingers)</li> </ol> |                                             |                | <b>Set A</b> | <b>Set B</b> | 1. Will a stone float on water? | 1. Will a leaf float on water? | 2. Are there fish in the sea? | 2. Are there elephants in the sea? | 3. Does one pound weigh more than two pounds? | 3. Do two pounds weigh more than one pound? | 4. Can you use a hammer to pound a nail? | 4. Can you use a hammer to cut wood? |
| <b>Set A</b>                                                                                                                                                                                                                                                                                                                                                                                                                                                                                                                                                                                                                                                                                                                                                                                                                                                                                                                                                                                                                                                                                                                                                      | <b>Set B</b>                                |                |              |              |                                 |                                |                               |                                    |                                               |                                             |                                          |                                      |
| 1. Will a stone float on water?                                                                                                                                                                                                                                                                                                                                                                                                                                                                                                                                                                                                                                                                                                                                                                                                                                                                                                                                                                                                                                                                                                                                   | 1. Will a leaf float on water?              |                |              |              |                                 |                                |                               |                                    |                                               |                                             |                                          |                                      |
| 2. Are there fish in the sea?                                                                                                                                                                                                                                                                                                                                                                                                                                                                                                                                                                                                                                                                                                                                                                                                                                                                                                                                                                                                                                                                                                                                     | 2. Are there elephants in the sea?          |                |              |              |                                 |                                |                               |                                    |                                               |                                             |                                          |                                      |
| 3. Does one pound weigh more than two pounds?                                                                                                                                                                                                                                                                                                                                                                                                                                                                                                                                                                                                                                                                                                                                                                                                                                                                                                                                                                                                                                                                                                                     | 3. Do two pounds weigh more than one pound? |                |              |              |                                 |                                |                               |                                    |                                               |                                             |                                          |                                      |
| 4. Can you use a hammer to pound a nail?                                                                                                                                                                                                                                                                                                                                                                                                                                                                                                                                                                                                                                                                                                                                                                                                                                                                                                                                                                                                                                                                                                                          | 4. Can you use a hammer to cut wood?        |                |              |              |                                 |                                |                               |                                    |                                               |                                             |                                          |                                      |
| <b>4. Altered Level of Consciousness</b>                                                                                                                                                                                                                                                                                                                                                                                                                                                                                                                                                                                                                                                                                                                                                                                                                                                                                                                                                                                                                                                                                                                          | <b>Absent</b>                               | <b>Present</b> |              |              |                                 |                                |                               |                                    |                                               |                                             |                                          |                                      |
| <p>Is the patient's level of consciousness anything <i>other than alert</i> such as vigilant, lethargic, or stupor? (e.g., RASS other than "0" at time of assessment)</p> <p><b>Alert</b>           spontaneously fully aware of environment and interacts appropriately</p> <p><b>Vigilant</b>       hyperalert</p> <p><b>Lethargic</b>      drowsy but easily aroused, unaware of some elements in the environment, or not spontaneously interacting appropriately with the interviewer; becomes fully aware and appropriately interactive when prodded minimally</p> <p><b>Stupor</b>           becomes incompletely aware when prodded strongly; can be aroused only by vigorous and repeated stimuli, and as soon as the stimulus ceases, stuporous subject lapse back into the unresponsive state</p>                                                                                                                                                                                                                                                                                                                                                       |                                             |                |              |              |                                 |                                |                               |                                    |                                               |                                             |                                          |                                      |
| <b>Overall CAM-ICU (Features 1 and 2 and either Feature 3 or 4):</b>                                                                                                                                                                                                                                                                                                                                                                                                                                                                                                                                                                                                                                                                                                                                                                                                                                                                                                                                                                                                                                                                                              | <b>Yes</b>                                  | <b>No</b>      |              |              |                                 |                                |                               |                                    |                                               |                                             |                                          |                                      |
